# Supplementary material for: Nb and Ni Nanoparticles Anchored on N-Doped Carbon Nanofiber Membrane as Self-Supporting Anode for High-Rate Lithium-Ion Batteries
Source: MDPI journal article supplement (doi:10.3390/nano12213724), 2022-10-23
Supplement: s1 [file s1]

# Nb and Ni Nanoparticles Anchored on N-Doped Carbon Nanofiber Membrane as Self-Supporting Anode for High-Rate Lithium-Ion Batteries

Yezheng Zhang, Shan Zhang, Shuo Zhao, Yingxue Cui, Jiabiao Lian and Guochun Li \*

Institute for Energy Research, Jiangsu University, Zhenjiang 212013, China

\* Correspondence: liguochun@ujs.edu.cn

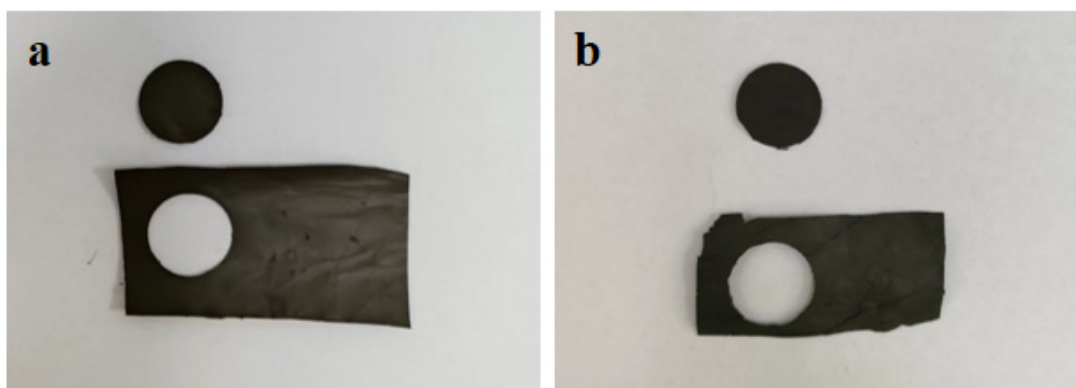

**Figure S1.** Digital images of (a,b) self-supporting Nb/Ni@NC and NC nanofiber membranes as electrode materials.

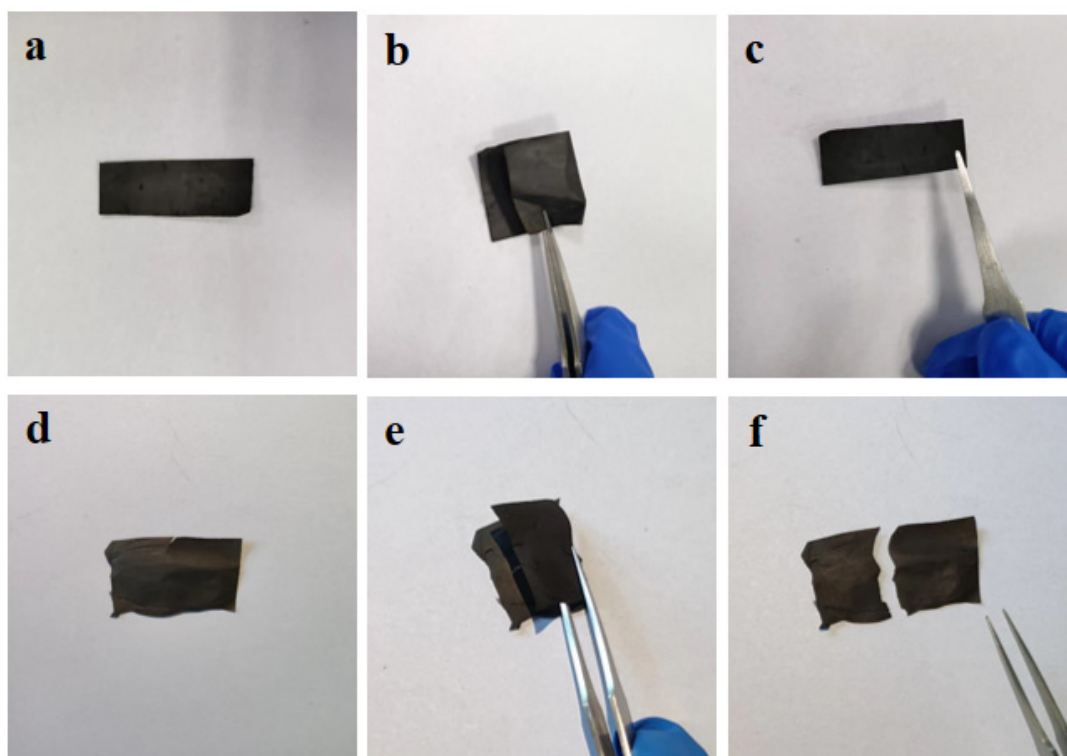

**Figure S2.** Folding tests of flexible Nb/Ni@NC and NC electrode materials.

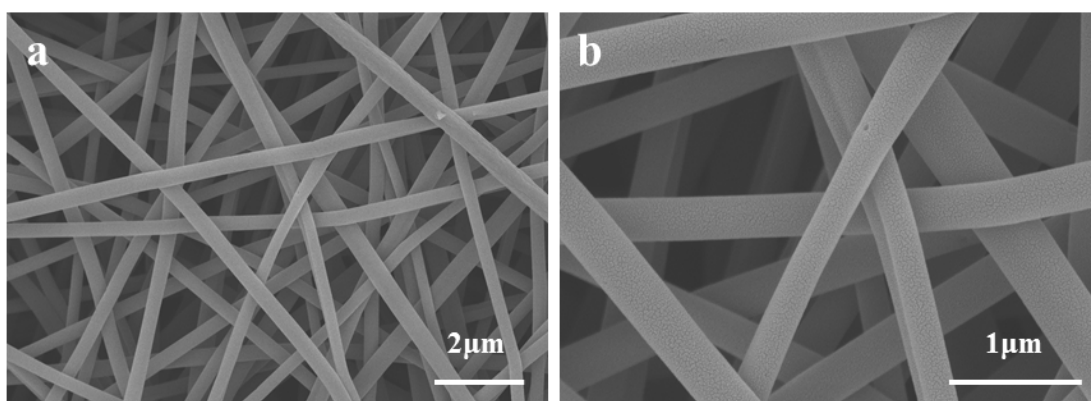

**Figure S3.** SEM images of NC nanofiber with low/high magnification.

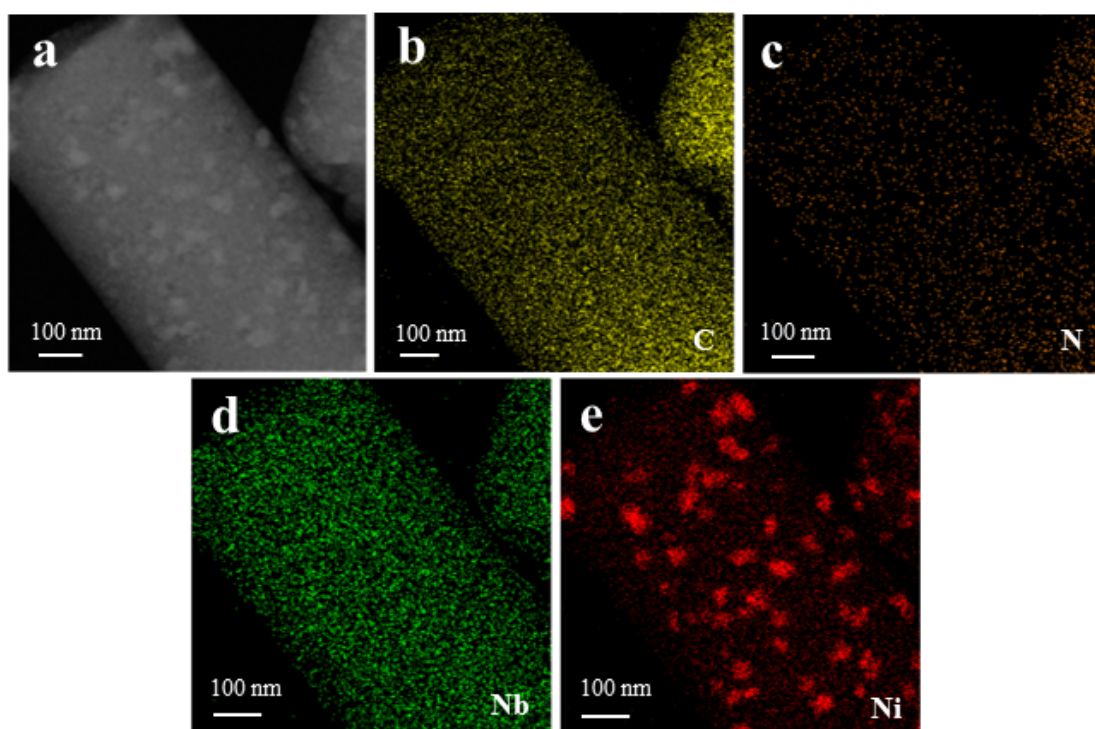

**Figure S4.** STEM image and EDS elemental mappings of Nb/Ni@NC nanofiber.

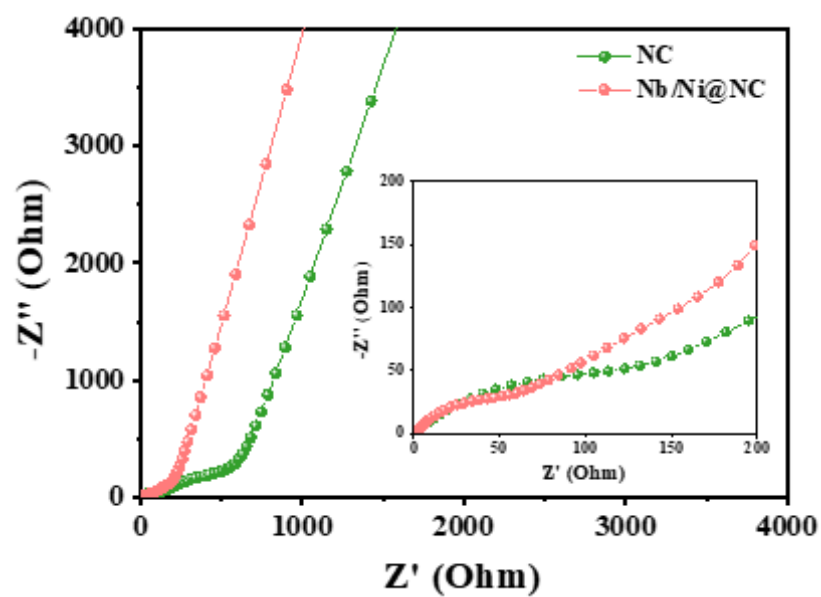

Figure S5. Nyquist plots of the flexible Nb/Ni@NC and NC electrodes.

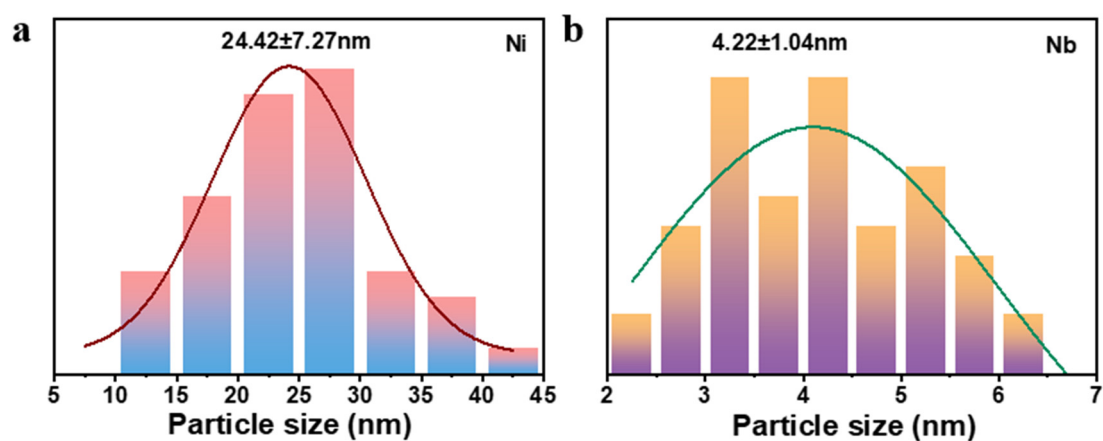

Figure S6. Results of particle size analysis of Ni (a) and Nb (b) nanoparticles.
